# Supplementary figures and images for: A comprehensive assessment of Next‐Generation Sequencing variants validation using a secondary technology
Source: PubMed Central journal article supplement — Mol Genet Genomic Med. 2019 Jun 4;7(7):e00748. doi: 10.1002/mgg3.748 (PMC6625156; doi:10.1002/mgg3.748), 2019-06-04

Supplemental figure 1

The correlation between Indels' size and depth

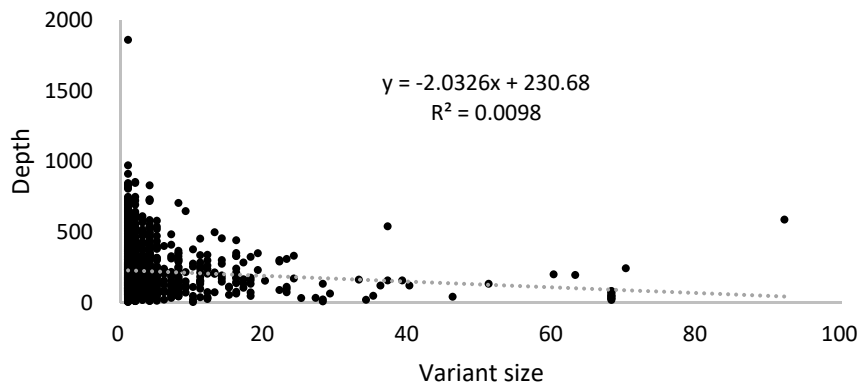

Supplement: MGG3-7-e00748-s001.pdf [file MGG3-7-e00748-s001.pdf]
